# Supplementary material
Source: PubMed Central journal article supplement (PMC2409027)
Supplement: pp.108.116269_1.pdf [file pp.108.116269_1.pdf]

**Supplemental Table 1.** Primers used in this study

| Gene/Probe                                           | Primer set                | Sequence (5' to 3')                                           |
|------------------------------------------------------|---------------------------|---------------------------------------------------------------|
| Pri-miR399a                                          | Forward                   | TGGCAGGAAACCATTACTTAGATCT                                     |
|                                                      | Reverse                   | TCACTAATTAAGCAATGCATAAAGAGA                                   |
| Pri-miR399b                                          | Forward                   | AGGTCCTTTACTTCCAAATATACACATACA                                |
|                                                      | Reverse                   | TCGATCATCGGAAATTTTCGA                                         |
| Pri-miR399c                                          | Forward                   | TCTTTCTATTGGCAGGCGACTT                                        |
|                                                      | Reverse                   | AATAGTCAAGAACACAAAAGATACAAATAGC                               |
| Pri-miR399d                                          | Forward                   | TTACTGGGCGAATACTCCTATGG                                       |
|                                                      | Reverse                   | ATTTTACTTGCATATCTAGCCAATGC                                    |
| Pri-miR399e                                          | Forward                   | AGTGGAAAGTTGATGACCCTTATATGTT                                  |
|                                                      | Reverse                   | TGGCAGAGGAAAATGATGAGAA                                        |
| Pri-miR399f                                          | Forward                   | TGTGGTGAGCTCTCTGCCAA                                          |
|                                                      | Reverse                   | TGGCGCAAGAGAATTACCG                                           |
| At2g33770<br>( <i>PHO2/UBC24</i> )                   | Forward                   | AGGTTTGAAGCTCCACCCTCA                                         |
|                                                      | Reverse                   | CCCAAGATGTGATTGGAGTTCC                                        |
| At4g05320 ( <i>UBQ10</i> )                           | Forward                   | GGCCTTGTATAATCCCTGATGAATAAG                                   |
|                                                      | Reverse                   | AAAGAGATAACAGGAACGGAAACATAGT                                  |
| <i>N. tobacco Actin</i><br>Accession no. AB158612    | Forward                   | TGGATCTTGCTGGTCGTGATC                                         |
|                                                      | Reverse                   | TCCGTCAAGATTTTCATCAAACA                                       |
| <i>N. benthamiana PHO2</i><br>Accession no. EU375892 | Forward                   | TGGCTCTGCTGGGCAAA                                             |
|                                                      | Reverse                   | CAAACAGCGGAACTTCACGAT                                         |
| Mature miR399d                                       | RT                        | GTCGTATCCAGTGCAGGGTCCGAGGTATTTCGCA<br>CTGGATACGACCGGGGC       |
|                                                      | Forward                   | CCGCTGCCAAAGGAGATT                                            |
|                                                      | Reverse                   | GTGCAGGGTCCGAGGT                                              |
|                                                      | TaqMan <sup>®</sup> probe | (6FAM)TGCCCCGGTCGTAT(MGB)                                     |
| <i>GFP:GUS</i>                                       | Forward                   | TCCGCCCTGAGCAAAGAC                                            |
|                                                      | Reverse                   | TCCAGCAGGACCATGTGATC                                          |
| Antisense probe<br>(ASP)                             | Forward                   | AGTTTCAGCTGACCGTTGCT                                          |
|                                                      | Reverse                   | TAATACGACTCACTATAGGCCTAATACGACTAAT<br>AGTTTAGACGCCTTGATGAGAAA |
| Sense probe<br>(SP)                                  | Forward                   | ATTTAGGTGACACTATAGACTAATACGACTAATA                            |
|                                                      | Reverse                   | GTTTCAGCTGACCGTTGCT<br>AGTTTAGACGCCTTGATGAGAAA                |
