# Supplementary material
Source: PubMed Central journal article supplement (PMC2409027)
Supplement: pp.108.116269_6.pdf [file pp.108.116269_6.pdf]

|             |           | Synthetic miRNA Target |           |         |         | Relative detection (%) |
|-------------|-----------|------------------------|-----------|---------|---------|------------------------|
|             |           | miR399a                | miR399b/c | miR399d | miR399f |                        |
| miRNA assay | miR399a   | 100.0                  | 27.9      | 0.0     | 0.0     |                        |
|             | miR399b/c | 18.7                   | 100.0     | 0.0     | 0.0     |                        |
|             | miR399d   | 0.0                    | 0.0       | 100.0   | 0.1     |                        |
|             | miR399f   | 0.0                    | 0.0       | 0.3     | 100.0   |                        |

miR399a 5'UGCCAAAGGAGAUUUGCCCUG 3'  
miR399b/c UGCCAAAGGAGAGUUGCCCUG  
miR399d UGCCAAAGGAGAUUUGCCC**CG**  
miR399f UGCCAAAGGAGAUUUGCCC**GG**
