# Supplementary material
Source: PubMed Central journal article supplement (PMC2409027)
Supplement: pp.108.116269_7.pdf [file pp.108.116269_7.pdf]

## SUPPLEMENTAL DATA

**Figure 1.** Identification of miR399-guided cleavage products. RNA duplexes between miR399f and 4 of 5 target sites (sites 2-5) on *PHO2* mRNAs are shown. Numbers indicate the fraction of cloned PCR products terminating at a given position. Results from the rootstocks of 399f/wt plants (red numbers), *pho1* mutant (blue numbers) and roots of Pi-starved wild-type plants (black numbers) are indicated. Mapping of cleavage sites was performed by the analysis of RNA ligase-mediated 5' rapid amplification of cDNA end (RLM-5' RACE). The 5' end of most mRNA fragments is mapped to the nucleotide that pairs to the 10th nucleotide of the miR399s.

**Figure 2.** Pi concentration in the scions of reciprocal grafts between wild-type and miR399c-overexpressing Arabidopsis plants. Each spot represents one data point from an independent grafted plant.

**Figure 3.** Pi toxicity phenotype (A) and shoot Pi concentration (B) in transgenic tobacco plants overexpressing Arabidopsis miR399b or miR399f compared to wild-type tobacco plants. C, The sequence alignment among Arabidopsis miR399s and four potential target sites on the tobacco *PHO2* mRNA. Bar = 5 cm in A.

**Figure 4.** A, Processing efficiency of miR171b in shoots and roots of wild-type plants grown under Pi-sufficient (+Pi) or -deficient (-Pi) conditions. The processing efficiency is indicated as a ratio of mature miR171b to pri-miR171b. B, Promoter activities of miR399a, b, c or f in shoots versus in roots. The promoter activity is presented as the abundance of *erGFP* mRNA driven by the miR399 promoter. Two independent transgenic lines are shown for each promoter.

**Figure 5.** Specificity of TaqMan<sup>®</sup> miRNA assays among different miR399 species. Relative detection (%) is calculated on the basis of the  $C_T$  difference between perfectly matched and mismatched synthetic miRNAs. A total of  $2 \times 10^7$  copies of synthetic RNA, which represents the physiological concentrations of miR399s was added to each TaqMan<sup>®</sup> reaction. Sequences of miR399 species are shown and nucleotides different from others are highlighted.
