# Supplementary material
Source: PubMed Central journal article supplement (PMC2409027)

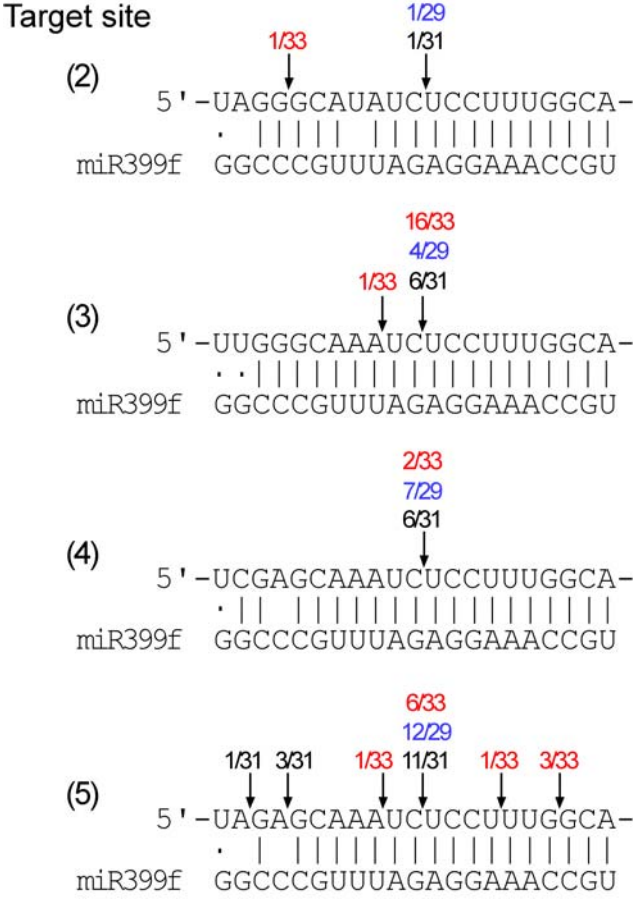

Supplement: pp.108.116269_2.pdf [file pp.108.116269_2.pdf]

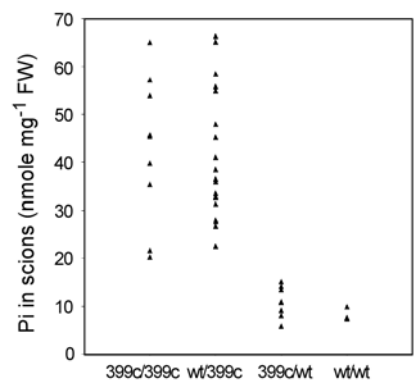

Supplement: pp.108.116269_3.pdf [file pp.108.116269_3.pdf]

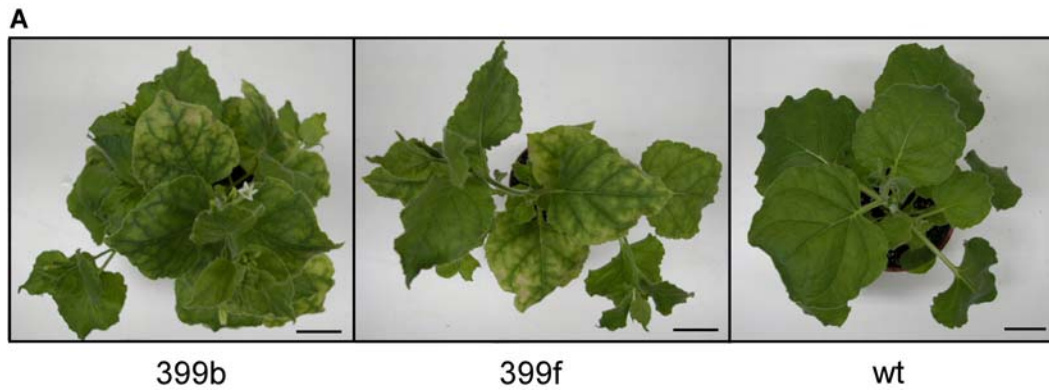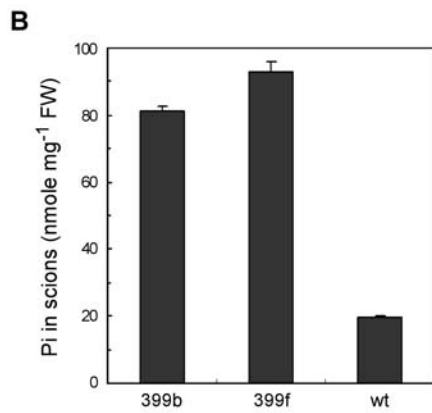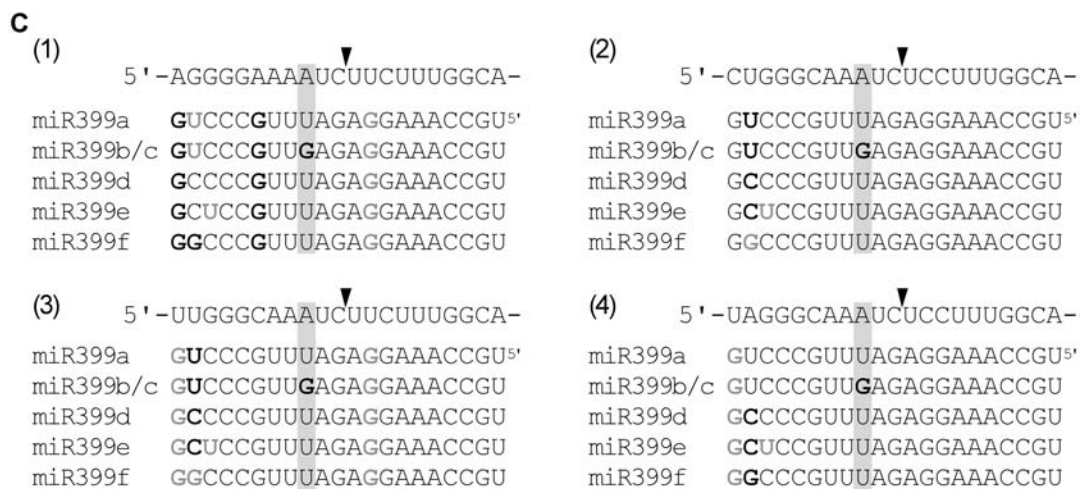

Supplement: pp.108.116269_4.pdf [file pp.108.116269_4.pdf]

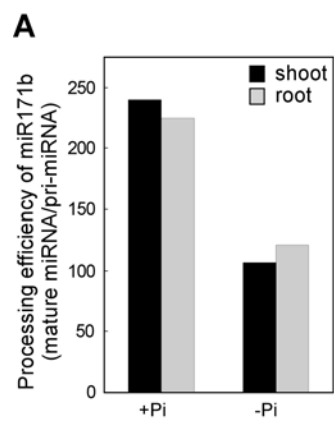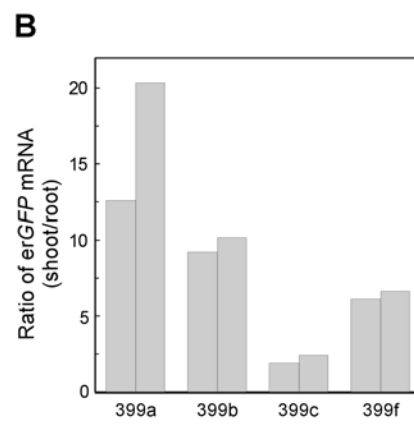

Supplement: pp.108.116269_5.pdf [file pp.108.116269_5.pdf]
